# Supplementary material
Source: PubMed Central journal article supplement (PMC8626094)
Supplement: mmc1.pdf [file mmc1.pdf]

# THE LANCET

## Infectious Diseases

### Supplementary appendix 1

This translation in French was submitted by the authors and we reproduce it as supplied. It has not been peer reviewed. *The Lancet's* editorial processes have only been applied to the original in English, which should serve as reference for this manuscript.

Supplement to: Delaugerre C, Foissac F, Abdoul H, et al. Prevention of SARS-CoV-2 transmission during a large, live, indoor gathering (SPRING): a non-inferiority, randomised, controlled trial. *Lancet Infect Dis* 2021; published online Nov 26. [https://doi.org/10.1016/S1473-3099\(21\)00673-3](https://doi.org/10.1016/S1473-3099(21)00673-3).

Cette traduction en français a été proposée par les auteurs et nous l'avons reproduite telle quelle. Elle n'a pas été examinée par des pairs. Les processus éditoriaux du *Lancet* n'ont été appliqués qu'à l'original en anglais et c'est cette version qui doit servir de référence pour ce manuscrit.

## **Contexte**

L'épidémie de COVID-19 a mis à l'arrêt, depuis février 2020, tous les rassemblements de plus de 5 000 personnes pour éviter toute flambée épidémique. L'objectif de cette étude randomisée est d'évaluer si un protocole sanitaire incluant un test antigénique dans les 3 jours précédant l'évènement, le port du masque chirurgical et une ventilation optimisée permet de contrôler le taux d'infection chez des personnes participants à un rassemblement de grande ampleur dans une salle fermée sans distanciation physique.

## **Méthodes**

Il s'agit d'un essai monocentrique, prospectif, ouvert de non infériorité, contrôlé et randomisé en deux groupes selon un ratio 2:1. L'évènement s'est déroulé le 29 mai 2021 à l'Accor Arena, Paris, France. Les participants, recrutés via un site web dédié, avaient entre 18 et 45 ans, n'avaient pas de comorbidités, pas de symptôme évocateur de COVID-19, pas de contact récent avec une personne infectée par le SARS-CoV-2. Tous ont eu un test antigénique rapide dans les trois jours avant le concert. Seules les personnes, ayant signé un consentement, dont le test était négatif ont pu participer à l'expérience. Les participants ont ensuite été tirés au sort et inclus soit dans le groupe expérimental (participation au concert), soit dans le groupe contrôle (pas de participation au concert). Le critère de jugement principal était le nombre de participants avec une RT-PCR SARS-CoV-2 positive dans la salive 7 jours après le concert (analyse per-protocole avec une marge de non infériorité  $< 0.3.5\%$ ).

## **Résultats**

Entre le 11 et le 25 mai 2021, 18 845 personnes se sont inscrites sur le site web dédié, et 10 953 ont été invitées à la visite d'inclusion. Parmi les 6 968 personnes qui se sont présentées, 6 678 personnes ont été randomisées (4 451 groupe expérimental, 2 227 groupe contrôle). L'âge médian était de 28 ans et 58% étaient des femmes. 88% (3 917) des participants du groupe expérimental et 87% (1 947) des participants de groupe contrôle se sont conformés aux obligations du protocole (c'est à dire des prélèvements salivaires à J7 envoyés et analysables pour les 2 groupes et être venues au concert pour le groupe expérimental). Le nombre de participants ayant une PCR SARS-CoV-2 positive sur la salive 7 jours après l'évènement était de 8 parmi les 3 917 participants dans le groupe expérimental (Incidence [Intervalle de Confiance à 95%]: 0.20% [0.09 ; 0.40]) comparé à 3 parmi les 1 947 participants du groupe contrôle (0.15% [0.03 ; 0.45] ; différence absolue [-0.26%; +0.28%]), confirmant le critère de non infériorité.

## **Conclusion**

La participation à un grand rassemblement en intérieur sans distanciation physique n'a pas été associée à un sur-risque de transmission du SARS-CoV-2 à condition que des interventions de prévention soit mis en œuvre.
